# Supplementary material for: Verifying QBlade-Ocean: A Hydrodynamic Extension to the Wind Turbine Simulation Tool QBlade
Source: Copernicus journal article supplement (doi:10.5194/wes-2023-117), 2023-09-19

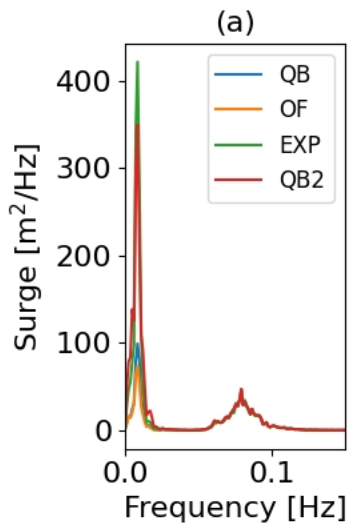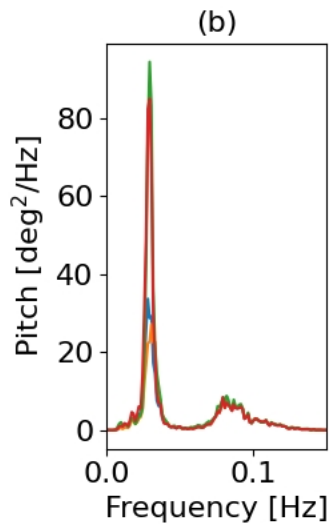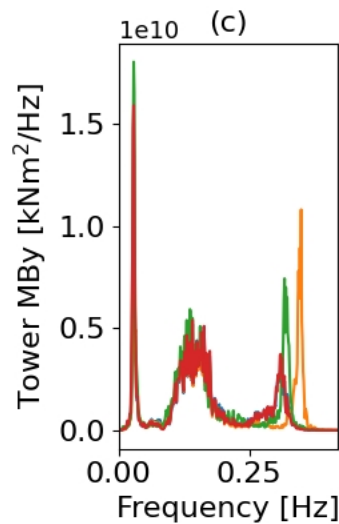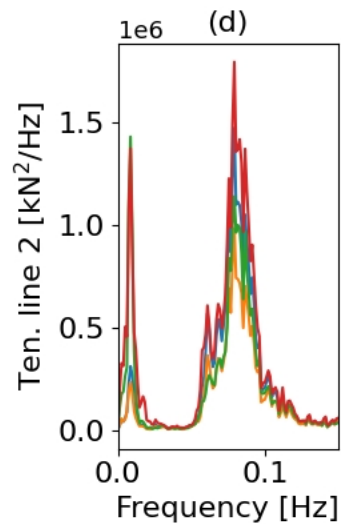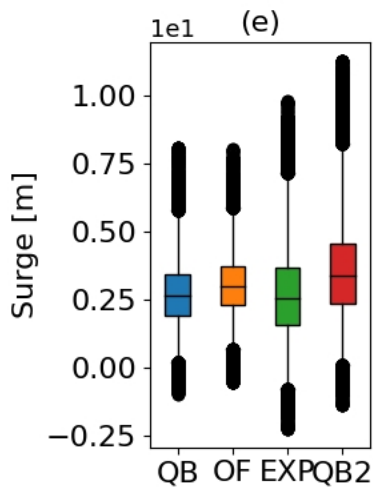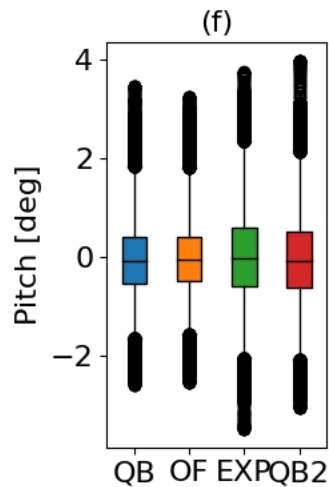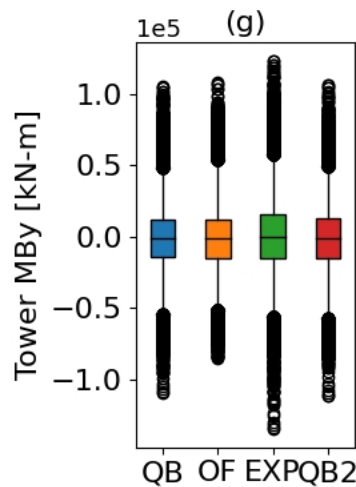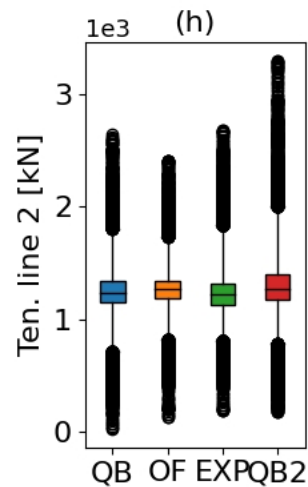

Supplement: Supplementary file [file wes-2023-117-AC2-supplement.pdf]
